# Supplementary material for: Inkjet printing of upconversion nanoparticles for anti-counterfeit applications
Source: Royal Society of Chemistry journal article supplement (doi:10.1039/c4nr06944g), 2015-01-01
Supplement: c4nr06944g1.pdf [file c4nr06944g1.pdf]

## Inkjet printing upconversion nanoparticles for anti-counterfeit applications

Minli You,<sup>\*a,b</sup> Junjie Zhong,<sup>\*b,c</sup> Yuan Hong,<sup>b,d</sup> Zhenfeng Duan,<sup>e</sup> Min Lin<sup>‡a,b,e</sup> and Feng Xu<sup>‡a,b</sup>

<sup>a</sup> The Key Laboratory of Biomedical Information Engineering of Ministry of Education, School of Life Science and Technology, Xi'an Jiaotong University, Xi'an 710049, P.R. China. *E-mail: fengxu@mail.xjtu.edu.cn*

<sup>b</sup> Bioinspired Engineering and Biomechanics Center (BEBC), Xi'an Jiaotong University, Xi'an 710049, P.R. China. *E-mail: minlin@mail.xjtu.edu.cn*

<sup>c</sup> School of Energy and Power Engineering, Xi'an Jiaotong University, Xi'an 710049, P.R. China.

<sup>d</sup> College of Life Sciences, Nanjing Agricultural University, Nanjing 210095, P.R. China.

<sup>e</sup> Center for Sarcoma and Connective Tissue Oncology, Massachusetts General Hospital, Harvard Medical School, MA 02114, USA

\* The authors contributed equally. ‡ Co-corresponding authors.

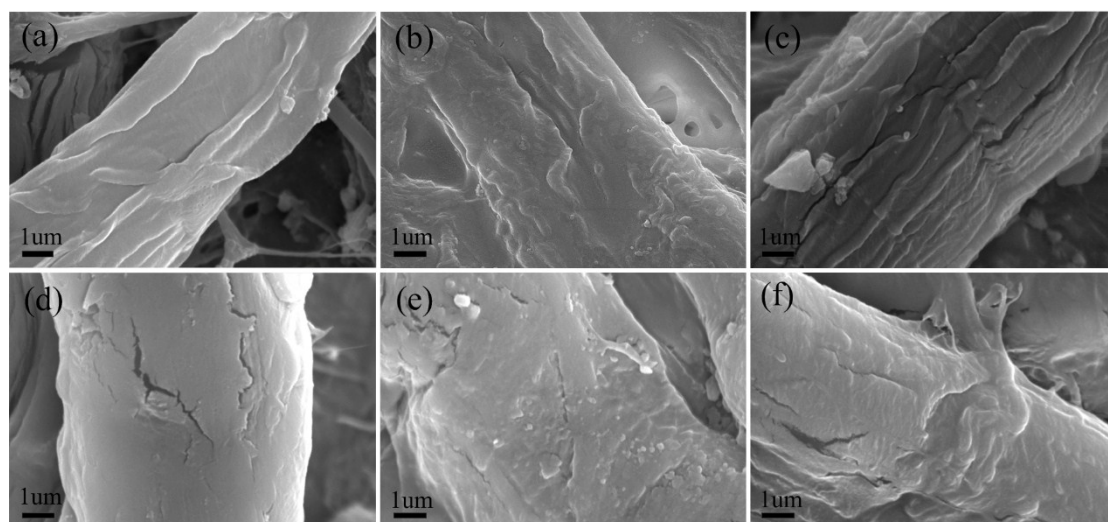

Figure. S1 SEM micrograph of A4 duplicating paper before (a) and after printed with solvent based ink (b) or aqueous based ink (c); vegetable parchment paper before (d) and after printed with solvent based ink (e) and aqueous based ink (f).
